# Supplementary material for: Optochemical properties of gas-phase protonated tetraphenylporphyrin investigated using an optical waveguide NH3 sensor
Source: Royal Society of Chemistry journal article supplement (doi:10.1039/c7ra11643h), 2018-01-01
Supplement: c7ra11643h1.pdf [file c7ra11643h1.pdf]

## Supplementary Materials

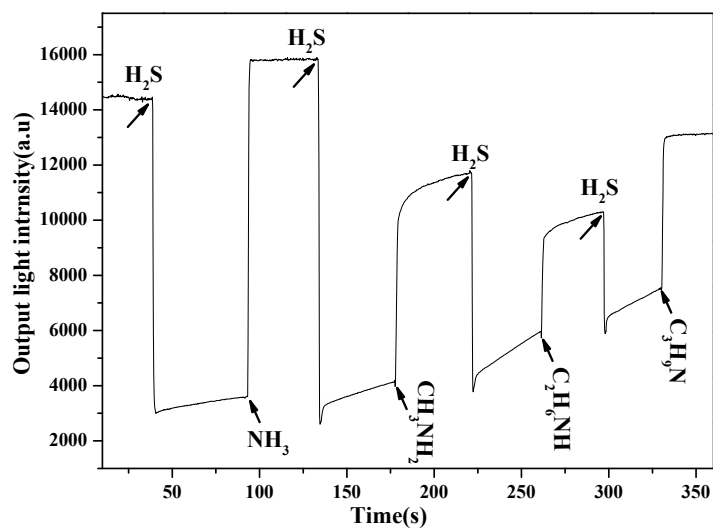

Figure S1. Response of protonated TPP thin film upon exposure to amine gases (100 ppm).
